# Supplementary material
Source: publisher site journal article supplement (https://www.dovepress.com/article/455339)
Supplement: Supplementary file 1 [file get_supplementary_file.php]

# **Inhibiting peptidoglycan hydrolase alleviates MRSA pneumonia through autolysin-mediated MDP-NOD2 pathway**

Yang Yang<sup>1,2</sup>, Zongze Yao<sup>1</sup>, Jiazhen Zhang<sup>1</sup>, Wei Shao<sup>3</sup>, Bo Li<sup>2</sup>, Huihui Wu<sup>2</sup>,  
Wenjian Tang<sup>3\*</sup>, Jing Zhang<sup>2\*</sup>

*<sup>1</sup> School of Medicine, Anhui University of Science and Technology, Huainan, People's Republic of China;*

*<sup>2</sup> Anhui Province Key Laboratory of Occupational Health, Anhui No.2 Provincial People's Hospital, Hefei, People's Republic of China;*

*<sup>3</sup> School of Pharmacy, Anhui Medical University, Hefei, People's Republic of China*

Correspondence: Wenjian Tang, Email: ahmupharm@126.com;

Jing Zhang, Tel +86-551-63672601, Email: hfzj2552@163.com

## **Content**

|                                                                                |                        |
|--------------------------------------------------------------------------------|------------------------|
| <b>Inhibition of PG cleavage and MDP synthesis by ZJ-2 in MRSA USA300 ....</b> | <b>Supplementary 1</b> |
| <b>Effect of ZJ-2 on inflammatory cells in the blood .....</b>                 | <b>Supplementary 2</b> |
| <b>Effect of ZJ-2 on cytokine levels by ELISA .....</b>                        | <b>Supplementary 3</b> |

### **ZJ-2 inhibited PG cleavage and MDP production in MRSA USA300**

The inhibitory effect of **ZJ-2** on PG hydrolysis was verified by detecting the content of free PG and MDP in the supernatant. The results showed that PG and MDP content in the supernatant of WT after 1/4MIC **ZJ-2** incubation hardly changed, while, those after 1/2MIC **ZJ-2** incubation decreased. Conversely, PG and MDP content in the supernatant of  $\Delta atlA$  after **ZJ-2** incubation didn't change (Figure S1A and B). In all, **ZJ-2** could inhibit PG hydrolysis and reduce MDP production by down-regulating the expression of autolysin-related genes.

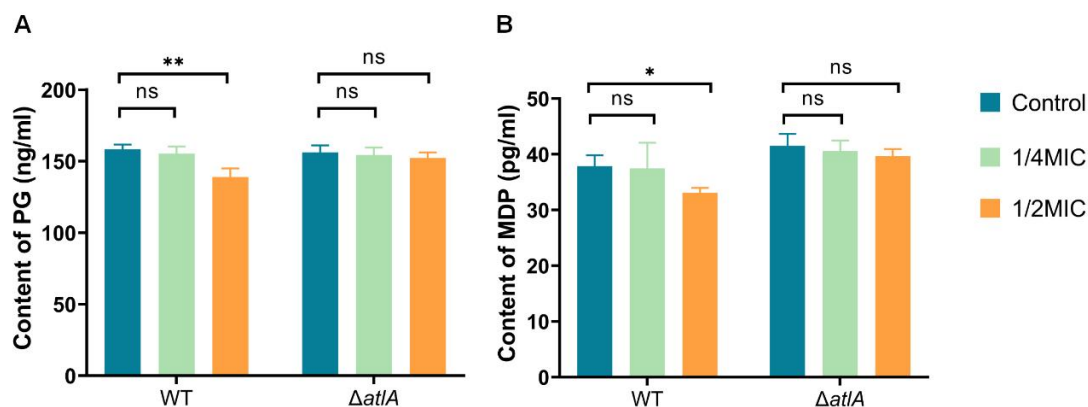

**Figure S1** The effect of **ZJ-2** on MRSA USA300 PG (A) and MDP (B) content was examined by ELISA kit. All samples were analyzed in three replicates.  $**P < 0.01$ ,  $*P < 0.05$ , when compared with the control.

### Effect of ZJ-2 on inflammatory cells in the blood

The therapeutic effect of **ZJ-2** on MRSA infection was evaluated by detecting the number of inflammatory cells in the blood of mice. As shown in [Figure S2](#), WBC, NEUT and LY were elevated in the blood of WT and  $\Delta atlA$  infection mice. After treatment with **ZJ-2** (or VAN), whether WT or  $\Delta atlA$ , these cells were all reduced. Notably, the number of inflammatory cells in WT-infected mice exhibited a greater reduction than those in  $\Delta atlA$ -infected mice. This further indicated that **ZJ-2** reduced inflammatory responses of MRSA infection by inhibiting autolysin-mediated PG hydrolysis.

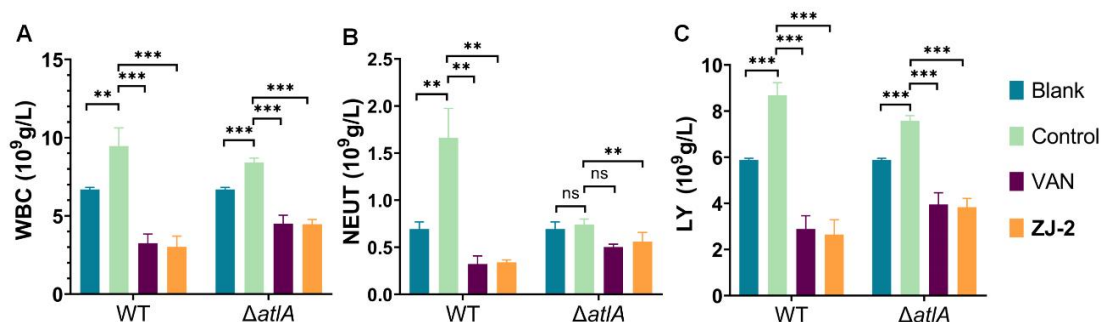

**Figure S2** The effect of **ZJ-2** on WBC (A), LY (B) and NEUT (C) was investigated by measuring the hematology of venous blood (n = 3). \*\*\* $P < 0.001$ , \*\* $P < 0.01$ , when compared with the control.

### Effect of ZJ-2 on the levels of cytokine

ELISA (Figure S3) were used to detect the levels of the inflammatory factors IL-6 and TNF- $\alpha$  in mouse alveolar lavage fluid and blood. Both ZJ-2 and VAN treatment decreased the levels of inflammatory factors, but the levels in  $\Delta atlA$  showed a more significant decline than those in WT. This suggested that ZJ-2 can decrease the levels of relative inflammatory cytokines by inhibiting MDP-NOD2 pathway.

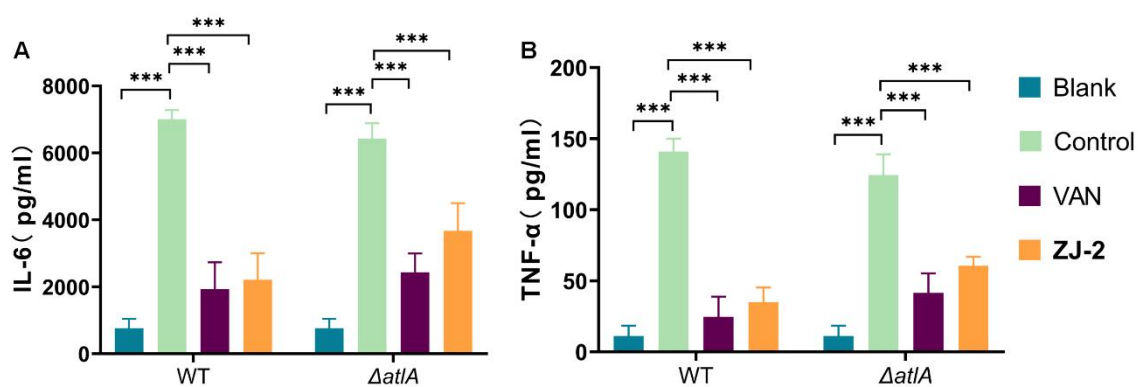

**Figure S3** ELISA detected the effect of ZJ-2 on IL-6 (A) and TNF- $\alpha$  (B) of mouse alveolar lavage fluid (n = 5). Values represent means  $\pm$  SD; \*\*\* $P < 0.001$ , when compared with the control.
